# Supplementary material for: Syndrome Differentiation in Chinese Herbal Medicine for Irritable Bowel Syndrome: A Literature Review of Randomized Trials
Source: Hindawi journal article supplement (doi:10.1155/2013/232147), 2013-01-01
Supplement: f1 [file 232147.f1.pdf]

## **Appendix: Search terms and Search Strategies for individual databases**

### **Search terms:**

Chinese terms: “*chang\_yi\_ji\_zong\_he\_zheng*” (irritable bowel syndrome), “*zhong\_yi*” (Chinese medicine), “*zhong\_yao*” (Chinese herbs), “*zhong\_yi\_yao*” (traditional Chinese medicine), “*zhong\_cheng\_yao*” (Chinese patent medicine), “*zhong\_cao\_yao*” (Chinese herb medicine), “*zhong\_xi\_yi\_jie\_he*” (integrated traditional and western medicine), “*sui\_ji*” (randomized), “*dui\_zhao*” (controlled)

English terms: “irritable bowel syndrome”, “herb”, “Chinese medicine”, “traditional medicine”, “plant extracts”, “alternative medicine”, “complementary medicine”, “randomized controlled trial”, “controlled clinical trial”

### **Search strategy:**

#### **CNKI**

- 1 “*chang\_yi\_ji\_zong\_he\_zheng*” (Title)
- 2 “*zhong\_yi*” (Title/Abstract)
- 3 “*zhong\_yao*” (Title/Abstract)
- 4 “*zhong\_yi\_yao*” (Title/Abstract)
- 5 “*zhong\_cheng\_yao*” (Title/Abstract)
- 6 “*zhong\_cao\_yao*” (Title/Abstract)
- 7 “*zhong\_xi\_yi\_jie\_he*” (Title/Abstract)
- 8 “*sui\_ji*” (All fields)
- 9 “*dui\_zhao*” (All fields)
- 10 or/ 2-7
- 11 or/ 8-9
- 12 10 and 11
- 13 1 and 12

#### **VIP**

- 1 “*chang\_yi\_ji\_zong\_he\_zheng*” (Title)
- 2 “*zhong\_yi*” (Title/Abstract)

- 3 “zhong\_yao” (Title/Abstract)
- 4 “zhong\_yi\_yao” (Title/Abstract)
- 5 “zhong\_cheng\_yao” (Title/Abstract)
- 6 “zhong\_cao\_yao” (Title/Abstract)
- 7 “zhong\_xi\_yi\_jie\_he” (Title/Abstract)
- 8 “sui\_ji” (All fields)
- 9 “dui\_zhao” (All fields)
- 10 or/ 2-7
- 11 or/ 8-9
- 12 10 and 11
- 13 1 and 12

## **CBM**

- 1 “chang\_yi\_ji\_zong\_he\_zheng” (Title)
- 2 “zhong\_yi” (Default)
- 3 “zhong\_yao” (Default)
- 4 “zhong\_yi\_yao” (Default)
- 5 “zhong\_cheng\_yao” (Default)
- 6 “zhong\_cao\_yao” (Default)
- 7 “zhong\_xi\_yi\_jie\_he” (Default)
- 8 “sui\_ji” (All fields)
- 9 “dui\_zhao” (All fields)
- 10 or/ 2-7
- 11 or/ 8-9
- 12 10 and 11
- 13 1 and 12

## **Wanfang**

- 1 “chang\_yi\_ji\_zong\_he\_zheng” (Title)
- 2 “zhong\_yi” (Keyword/Abstract)
- 3 “zhong\_yao” (Keyword/Abstract)

- 4 “zhong\_yi\_yao” (Keyword/Abstract)
- 5 “zhong\_cheng\_yao” (Keyword/Abstract)
- 6 “zhong\_cao\_yao” (Keyword/Abstract)
- 7 “zhong\_xi\_yi\_jie\_he” (Keyword/Abstract)
- 8 “sui\_ji” (All fields)
- 9 “dui\_zhao” (All fields)
- 10 or/ 2-7
- 11 or/ 8-9
- 12 10 and 11
- 13 1 and 12

### **PubMed**

- 1 irritable bowel syndrome.mh
- 2 herb.tw
- 3 Chinese medicine \$.tw
- 4 traditional medicine \$.tw
- 5 plant extract \$.tw
- 6 alternative medicine \$.tw
- 7 complementary medicine \$.tw
- 8 randomized controlled trial.pt
- 9 controlled clinical trial.pt
- 10 or/2-7
- 11 or/8-9
- 12 10 and 11
- 13 1 and 12

### **Cochrane library**

- 1 irritable bowel syndrome.mh
- 2 herb.tw
- 3 Chinese medicine.ti,ab,sh
- 4 traditional medicine. ti,ab,sh
- 5 plant extract. ti,ab,sh

6 alternative medicine. ti,ab,sh

7 complementary medicine. ti,ab,sh

8 randomized controlled trial.pt

9 controlled clinical trial.pt

10 or/2-7

11 or/8-9

12 10 and 11

13 1 and 12
